# Supplementary material for: Differential Spatio-Temporal Regulation of T-Box Gene Expression by microRNAs during Cardiac Development
Source: J Cardiovasc Dev Dis. 2021 May 14;8(5):56. doi: 10.3390/jcdd8050056 (PMC8156480; doi:10.3390/jcdd8050056)
Supplement: Supplementary file 1 [file jcdd-08-00056-s001.zip › jcdd-1115924-supplementary.pdf]

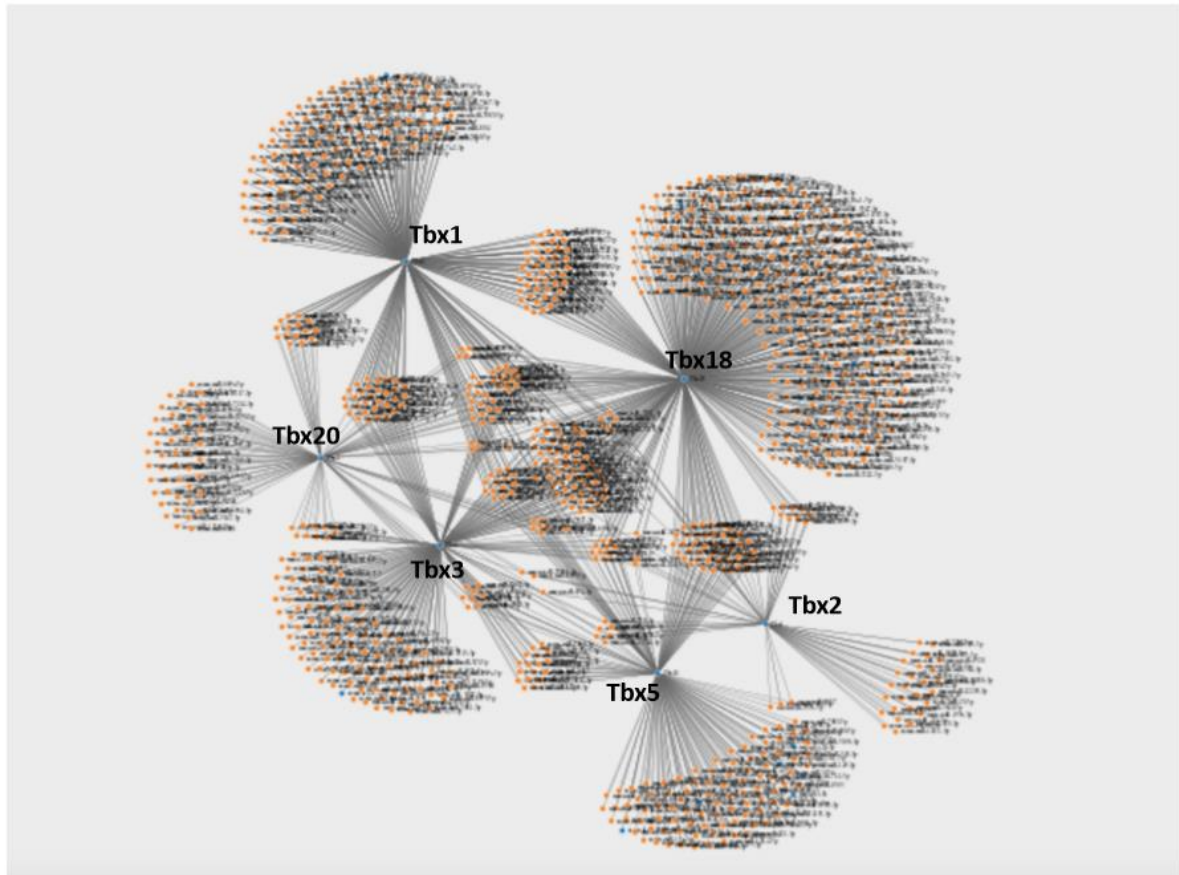

**Figure S1.** Tbx-microRNA gene regulatory network. Schematic representation of the plausible microRNA- Tbx gene regulatory network as predicted by MirWalk algorithm (<http://mirwalk.umm.uni-heidelberg.de>).

**Mouse TBX1 ENST00000332710.4 3' UTR length: 280**

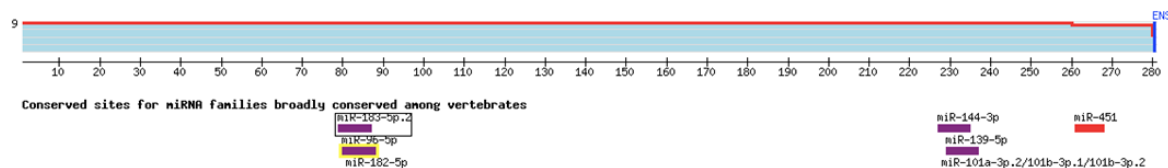

**Mouse TBX2 ENST00000240328.3 3' UTR length: 930**

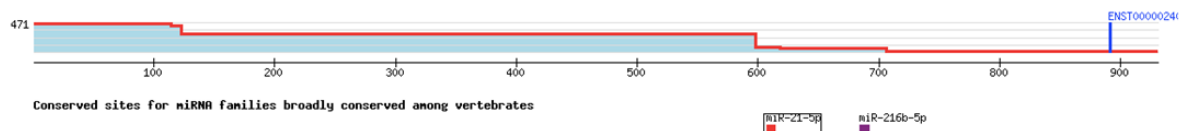

**Mouse TBX3 ENST00000349155.2 3' UTR length: 1525**

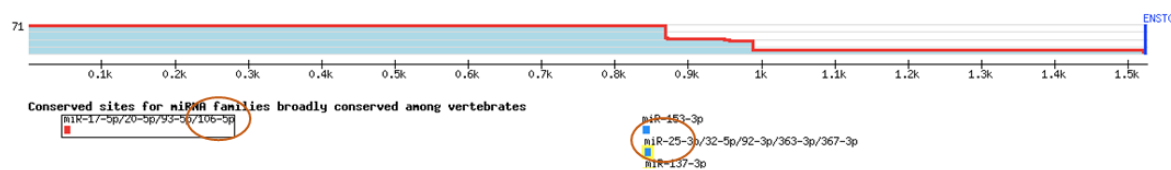

**Mouse TBX5 ENST00000349716.5 3' UTR length: 1652**

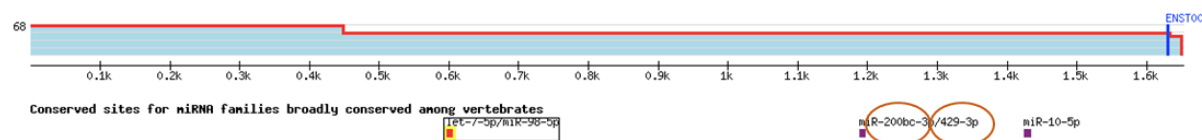

**Mouse TBX18 ENST00000369663.5 3' UTR length: 4122**

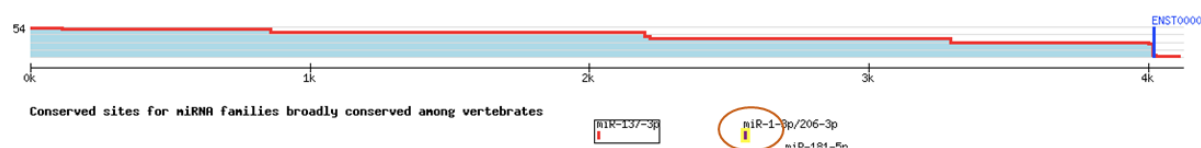

**Mouse TBX20 ENST00000408931.3 3' UTR length: 4718**

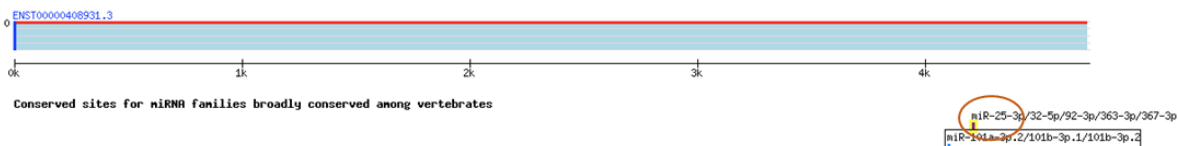

**Figure S2.** Tbx-microRNA evolutionarily conserved predicted interactions. Schematic representation of the predicted microRNA-Tbx interactions as reported by TargetScan algorithm (<http://www.targetscan.org>). Selected microRNAs are encircled in red.

*Tbx-microRNA Complementary expression patterns*

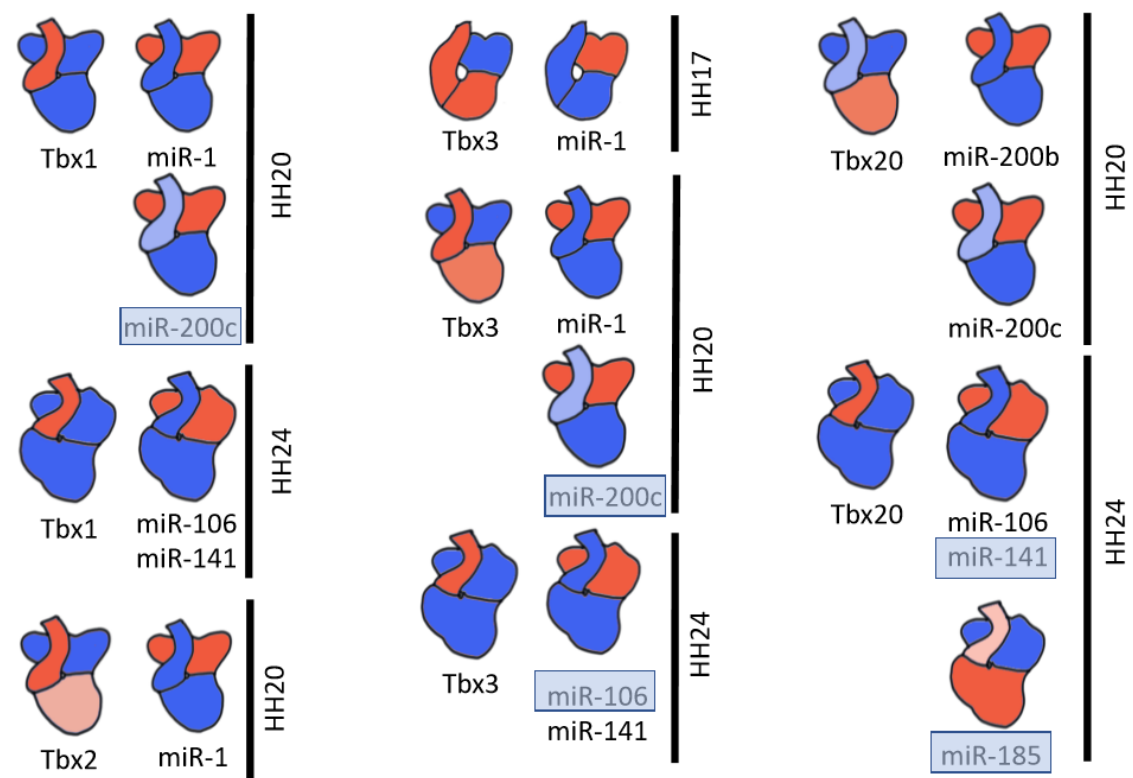

**Figure S3.** Complementary Tbx-microRNA expression profiles during cardiogenesis. Schematic representation of the Tbx-microRNA complementary expression patterns observed at different cardiac regions in distinct developmental stages. microRNAs that are bioinformatically predicted to target the corresponding T-box gene are caged in blue.

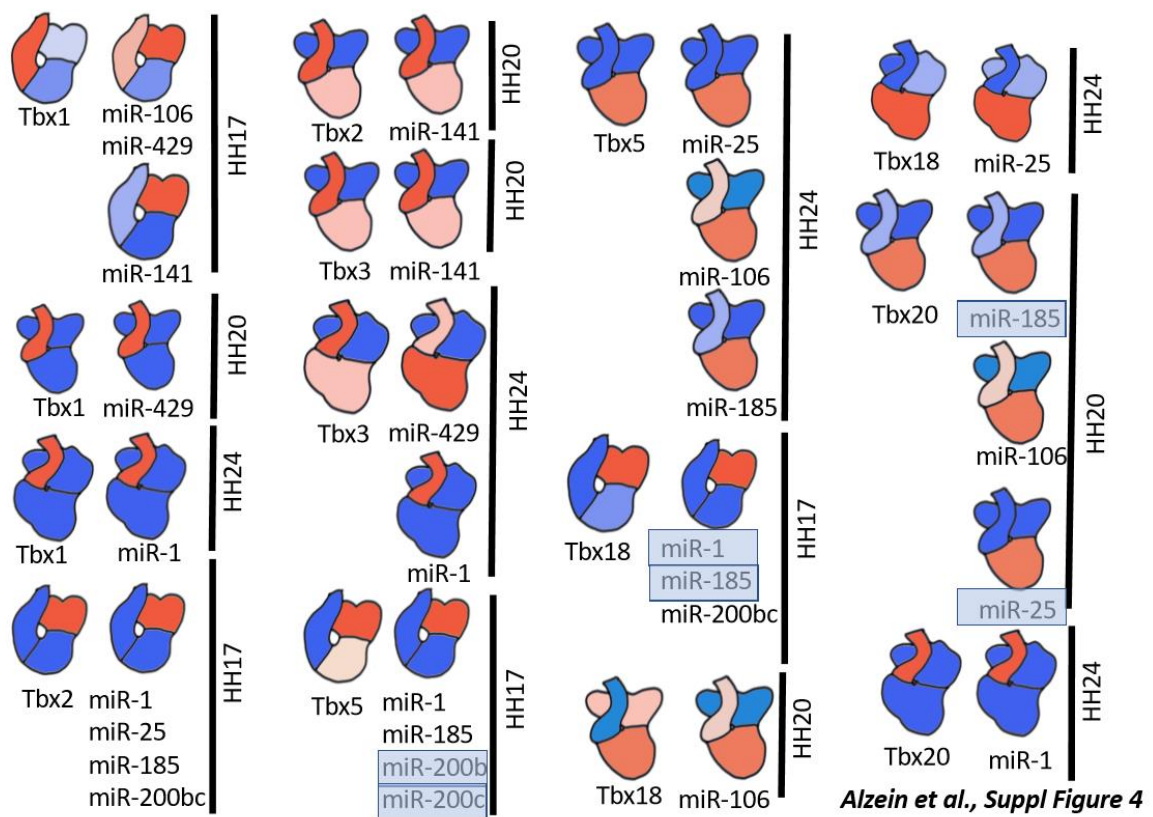

**Figure S4.** Similar Tbx-microRNA expression profiles during cardiogenesis. Schematic representation of the Tbx-microRNA similar expression patterns observed at different cardiac regions in distinct developmental stages. microRNAs that are bioinformatically predicted to target the corresponding T-box gene are caged in blue.

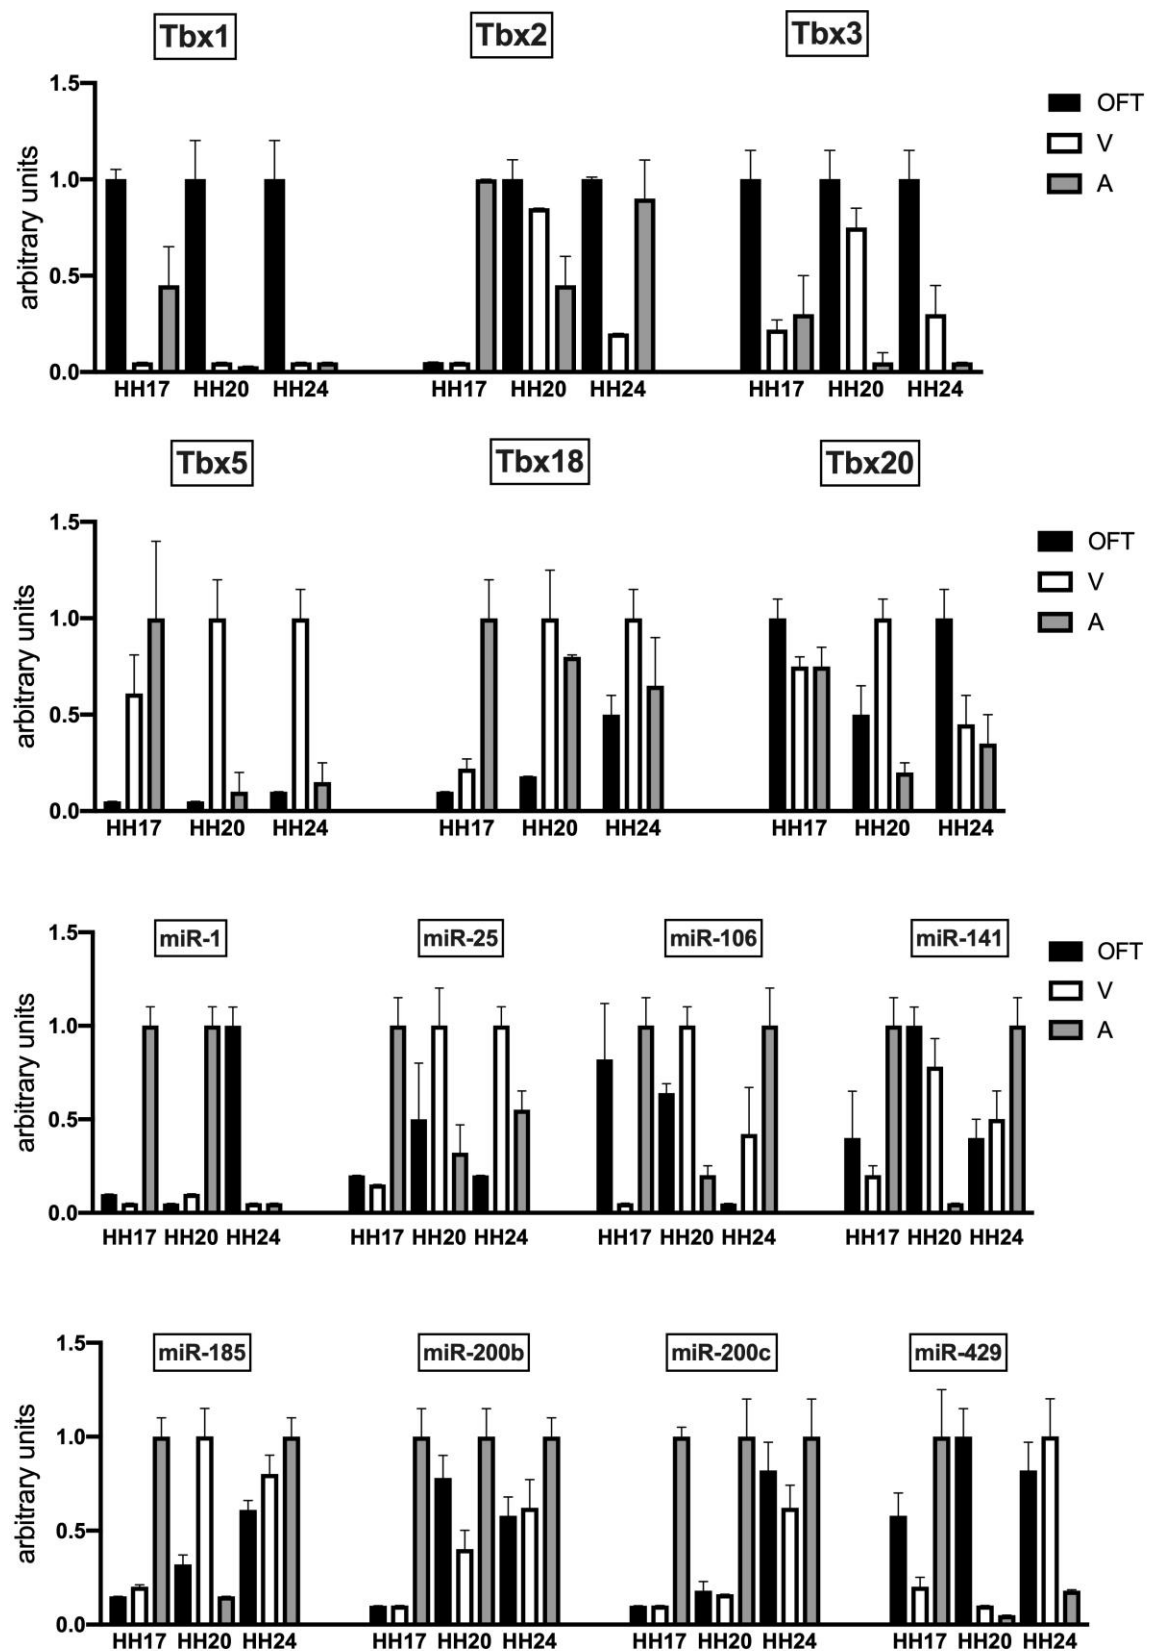

Figure S5. qPCR T-box and microRNA gene expression in cardiogenesis.

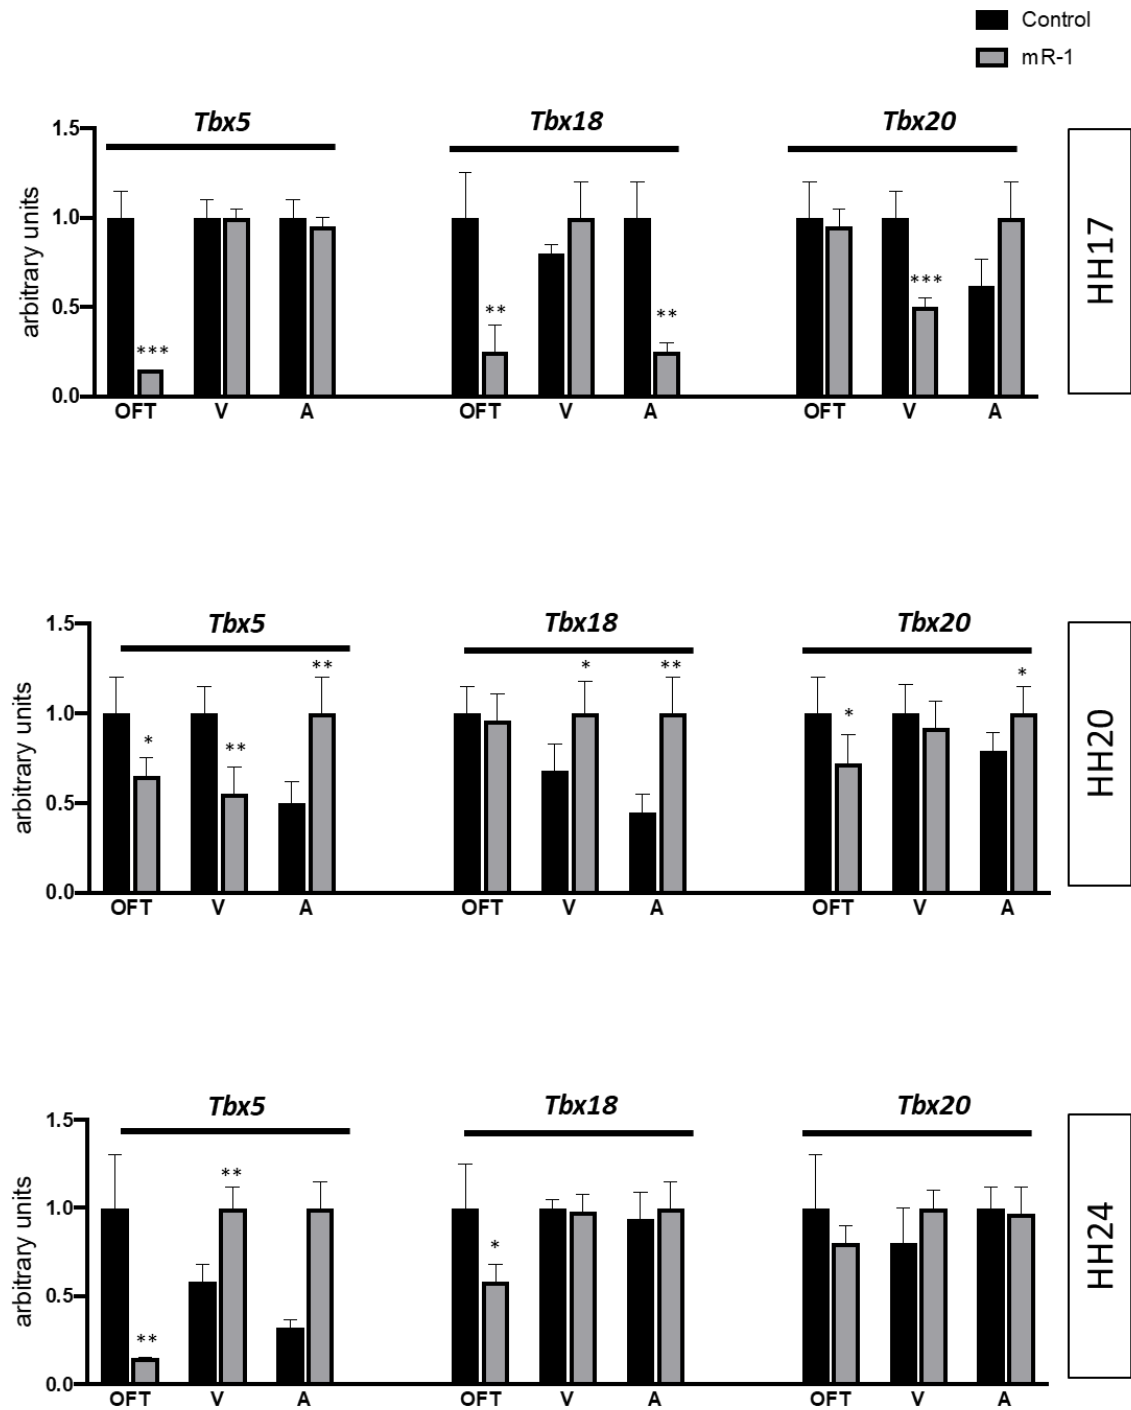

Figure S6. T-box modulation by microRNAs.
